# Supplementary material for: An 83 000-year-old ice core from Roosevelt Island, Ross Sea, Antarctica
Source: Copernicus journal article supplement (doi:10.5194/cp-16-1691-2020), 2020-09-02
Supplement: Supplementary file 1 [file cp-16-1691-2020-supplement.zip]

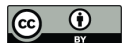

## *Supplement of*

# **An 83 000-year-old ice core from Roosevelt Island, Ross Sea, Antarctica**

**James E. Lee et al.**

*Correspondence to:* James E. Lee ([jlee@coas.oregonstate.edu](mailto:jlee@coas.oregonstate.edu))

- [cp-16-1691-2020-supplement-title-page.pdf](#)
- [Matlab\\_Code.zip](#)
- [RICE\\_agefiles.zip](#)
- [RICE\\_datafiles.zip](#)

The copyright of individual parts of the supplement might differ from the CC BY 4.0 License.
