# Supplementary material for: An 83 000-year-old ice core from Roosevelt Island, Ross Sea, Antarctica
Source: Copernicus journal article supplement (doi:10.5194/cp-16-1691-2020), 2020-09-02
Supplement: Supplementary file 2 [file cp-16-1691-2020-supplement.zip]

Archive with 4 entries (4 files):
- RICE_agefiles.zip
- Matlab_Code.zip
- RICE_datafiles.zip
- cp-16-1691-2020-supplement-title-page.pdf
